# Supplementary material
Source: publisher figshare collection journal article supplement (https://frontiersin.figshare.com/ndownloader/files/16250063)
Supplement: Supplementary file 1 [file 16250063]

Supplementary Table 1

**Echocardiographic characteristics in mice after sham or coronary artery ligation Operation**

|  | Sham | Vehicle | STS | STS+Cq |
| --- | --- | --- | --- | --- |
| HR | 441±23 | 449±15 | 453±16 | 458±13 |
| CO (mL/min) | 21.50±3.51 | 10.28±2.15 | 18.91±3.21∗ | 12.73±2.17& |
| LVEDD (mm) | 3.39±0.15 | 4.39±0.21# | 3.58±0.31∗ | 4.26±0.23& |
| LVESD (mm) | 1.57±0.11 | 3.74±0.15# | 1.97±0.15∗ | 3.04±0.25& |
| LVPWd (mm) | 0.85±0.03 | 0.95±0.03 | 0.71±0.03∗ | 0.85±0.02& |
| LVPWs (mm) | 1.06±0.02 | 1.31±0.03# | 0.81±0.02∗ | 1.06±0.03& |
| FS% | 45.68±2.98 | 14.82±2.89# | 44.97±3.68∗ | 28.63±2.76& |
| EF% | 74.29±2.45 | 35.01±1.34# | 68.65±1.45∗ | 43.30±1.23& |

HR, heart rate; LVEDD, left ventricular end diastolic diameter; LVESD, left ventricular end-systolic diameter; FS, fractional shortening; and EF, ejection fraction. All values are mean±SE.

#*P* < 0.05 versus Sham; ∗*P* < 0.05 versus vehicle; &*P* < 0.05 versus STS. Veh, vehicle; STS, Sodium tanshinone IIA sulfonate; Cq, chloroquine.

Supplementary Table 2

|  | Sham | Vehicle | STS | STS+Cq |
| --- | --- | --- | --- | --- |
| BW (mg) | 32.86±0.5 | 33.14±0.4 | 31.91±0.2 | 29.1±0.3 |
| HW (mg) | 131±4.3 | 172±3.4# | 135±3.2∗ | 163±4.2& |
| TL (mm) | 21.2±0.4 | 20.6±0.3 | 20.8±0.4 | 20.8±0.3 |
| HW/BW | 3.98±0.12 | 5.18±0.14# | 4.23±0.56∗ | 5.62±0.75& |
| HW/TL | 6.18 | 8.35# | 6.49∗ | 7.84& |

BW indicates body weight; HW, heart weight; TL, Tibial length. #*P* < 0.05 versus Sham; ∗*P* < 0.05 versus vehicle; &*P* < 0.05 versus STS. Veh, vehicle; STS, Sodium tanshinone IIA sulfonate; Cq, chloroquine.
